# Supplementary material for: Characterization of Salmonella Phage LPST153 That Effectively Targets Most Prevalent Salmonella Serovars
Source: PubMed Central journal article supplement (PMC7409278; doi:10.3390/microorganisms8071089), 2020-07-21
Supplement: microorganisms-08-01089-s001.pdf [file microorganisms-08-01089-s001.pdf]

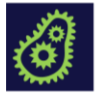

1 *Supplementary Materials*

2 **Characterization of *Salmonella* Phage LPST153 That**  
3 **Effectively Target Most Prevalent *Salmonella***  
4 **Serovars**

5 **Md. Sharifull Islam<sup>1,2,3</sup>, Yang Hu<sup>4</sup>, Md. Furkanur Rahaman Mizan<sup>5</sup>, Ting Yan<sup>3</sup>, Ishatur Nime<sup>3</sup>,**  
6 **Yang Zhou<sup>1,2,\*</sup> and Jinqun Li<sup>2,3,6</sup>**

7 <sup>1</sup> College of Fisheries, Huazhong Agricultural University, Wuhan, Hubei, People's Republic of China;  
8 [zhouyang@mail.hzau.edu.cn](mailto:zhouyang@mail.hzau.edu.cn) (Y.Z)

9 <sup>2</sup> State Key Laboratory of Agricultural Microbiology, Huazhong Agricultural University, Wuhan, Hubei,  
10 People's Republic of China; [smbgb101287@yahoo.com](mailto:smbgb101287@yahoo.com) (M.S.I.); [zhouyang@mail.hzau.edu.cn](mailto:zhouyang@mail.hzau.edu.cn) (Y.Z);  
11 [lijinquan2007@gmail.com](mailto:lijinquan2007@gmail.com) (J. Li)

12 <sup>3</sup> Key Laboratory of Environment Correlative Dietology, College of Food Science and Technology,  
13 Huazhong Agricultural University, Wuhan, Hubei, People's Republic of China;  
14 [smbgb101287@yahoo.com](mailto:smbgb101287@yahoo.com) (M.S.I.); [yantingau@163.com](mailto:yantingau@163.com) (T.Y.); [smbgb101287@gmail.com](mailto:smbgb101287@gmail.com) (I.N.);  
15 [lijinquan2007@gmail.com](mailto:lijinquan2007@gmail.com) (J. Li.)

16 <sup>4</sup> Division of Microbiology, Brewing and Biotechnology, School of Biosciences, University of Nottingham, S  
17 utton Bonington Campus LE12 5RD, UK; [stxyh26@exmail.nottingham.ac.uk](mailto:stxyh26@exmail.nottingham.ac.uk) (Y.H.)

18 <sup>5</sup> Department of Food Science and Technology, Chung-Ang University, Anseong, Gyunggido, Republic of  
19 Korea; [rahaman4162@cau.ac.kr](mailto:rahaman4162@cau.ac.kr)

20 <sup>6</sup> Laboratory of Bacterial Pathogenesis and Immunology, The Rockefeller University, New York, New York,  
21 USA; [lijinquan2007@gmail.com](mailto:lijinquan2007@gmail.com) (J. Li.)

22 \* Correspondence: [zhouyang@mail.hzau.edu.cn](mailto:zhouyang@mail.hzau.edu.cn) (Y.Z)

23 Received: date; Accepted: date; Published: date



Table S1. Functional annotation of LPST153 CDSs

| ORF | Gene Positions | Functions                                               | Name                       |           |
|-----|----------------|---------------------------------------------------------|----------------------------|-----------|
| 1   | 410-565        | gp19.5 [Enterobacteria phage BA14]                      | PHA00406                   | PHA00406  |
| 2   | 834-2591       | DNA packaging protein B [Erwinia phage FE44]            |                            |           |
| 3   | 2601-3032      | endopeptidase Rz [Salmonella phage BP12A]               |                            |           |
| 4   | 3131-3397      | DNA packaging protein A [Salmonella phage BP12A]        | HNH_3                      | pfam13392 |
| 5   | 3390-3596      | class II holing [Salmonella phage BP12A]                |                            |           |
| 6   | 3609-5549      | tail fibers protein [Salmonella phage BP12A]            |                            |           |
| 7   | 5621-9568      | gp16 [Enterobacteria phage 285P]                        | PhageP22-tail super family | cl07762   |
| 8   | 9592-11868     | gp15 [Enterobacteria phage 285P]                        | RPA like super family      | cl09930   |
| 9   | 11871-12485    | gp14 [Enterobacteria phage BA14]                        | ERF                        | pfam04404 |
| 10  | 12488-12904    | gp13 [Yersinia phage Yepe2]                             | PHA00432                   | PHA00432  |
| 11  | 12984-15359    | tail tubular protein B [Salmonella phage BP12A]         |                            |           |
| 12  | 15395-15985    | tail tubular protein A [Salmonella phage BP12A]         | PHA00428                   | PHA00428  |
| 13  | 16193-17227    | major capsid protein [Salmonella phage BP12A]           | PHA00201                   | PHA00201  |
| 14  | 17395-18306    | capsid and scaffold protein [Escherichia phage P694]    | PHA00435                   | PHA00435  |
| 15  | 18378-19979    | collar protein [Escherichia phage Ebrios]               | Head-tail_con              | pfam12236 |
| 16  | 19992-20330    | tail assembly protein [Yersinia phage vB_YenP_AP10]     | PHA00437                   | PHA00437  |
| 17  | 20348-20623    | gp6.7 [Enterobacteria phage 285P]                       | PHA00441                   | PHA00441  |
| 18  | 20643-20888    | gp6.5 [Enterobacteria phage 285P]                       | PHA00438                   | PHA00438  |
| 19  | 20839-20931    | unknown product [Enterobacteria phage BA14]             |                            |           |
| 20  | 21056-21970    | exonuclease [Escherichia phage vB_EcoP_S523]            | PHA00439                   | PHA00439  |
| 21  | 21967-22254    | gp5.8 [Erwinia phage vB_EamP-L1]                        |                            |           |
| 22  | 22251-22460    | HNS binding protein [Escherichia phage P483]            | PHA00422                   | PHA00422  |
| 23  | 22460-22753    | gp5.5 [Enterobacteria phage BA14]                       | DUF2675 super family       | cl26474   |
| 24  | 22764-22991    | hypothetical protein BP12A_20A [Salmonella phage BP12A] |                            |           |
| 25  | 22991-25105    | DNA polymerase [Salmonella phage BP12A]                 | DNA_pol_A super family     | cl02626   |
| 26  | 25118-25534    | gp4.7 [Enterobacteria phage BA14]                       | GH3 super family           | cl21606   |

|    |             |                                                                              |                       |           |
|----|-------------|------------------------------------------------------------------------------|-----------------------|-----------|
| 27 | 25622-25924 | gp4.5 [Enterobacteria phage BA14]                                            | PHA00446              | PHA00446  |
| 28 | 25938-26150 | gp4.3 [Enterobacteria phage BA14]                                            | PHA00448              | PHA00448  |
| 29 | 26143-26337 | gp4.2 [Yersinia phage Yep-phi]                                               | PHA00476 super family | cl10223   |
| 30 | 26282-27994 | DNA primase/helicase [Salmonella phage BP12A]                                | GP4d_helicase         | cd01122   |
| 31 | 28163-28618 | lysozyme/N-acetylmuramoyl-L-alanine amidase[Klebsiella phage vB_KpnP_PRA33]S | PHA00447              | PHA00447  |
| 32 | 28615-29061 | endonuclease [Escherichia phage P483]                                        | PHA00159              | PHA00159  |
| 33 | 29061-29768 | DNA-binding protein [Salmonella phage BP12A]                                 | PHA00458              | PHA00458  |
| 34 | 29836-30027 | bacterial RNA polymerase inhibitor [Kluyvera phage Kvp1]                     | PHA00457              | PHA00457  |
| 35 | 30024-30122 | gp1.8 [Enterobacteria phage BA14]                                            | PHA00456              | PHA00456  |
| 36 | 30115-30465 | gp1.7 [Yersinia phage Yep-phi]                                               | DUF3310               | pfam11753 |
| 37 | 30465-30725 | gp1.6 [Enterobacteria phage BA14]                                            | PHA00455              | PHA00455  |
| 38 | 30905-31978 | DNA ligase [Escherichia phage P694]                                          | PHA00454              | PHA00454  |
| 39 | 32079-32339 | deoxyguanosine inhibitor [Pectobacterium phage PP74]                         | DUF2745 super family  | cl26487   |
| 40 | 32341-32490 | gp1.1 [Enterobacteria phage BA14]                                            | PHA01327              | PHA01327  |
| 41 | 32584-33141 | gp1.1 [Enterobacteria phage BA14]                                            |                       |           |
| 42 | 33230-34237 | DNA-dependent RNA polymerase [Salmonella phage BP12A]                        | RNA_pol super family  | cl25973   |
| 43 | 34227-36008 | RNA polymerase [Escherichia phage vB_EcoP_S523]                              | PHA00452              | PHA00452  |
| 44 | 36082-37185 | protein kinase [Salmonella phage BP12A]                                      | PHA00451              | PHA00451  |
| 45 | 37199-37417 | 0.6B protein [Enterobacteria phage T7]                                       |                       |           |
| 46 | 37401-37598 | gp0.6A [Enterobacteria phage BA14]                                           |                       |           |
| 47 | 37598-37741 | hypothetical protein [Yersinia phage phiYe-F10]                              |                       |           |
| 48 | 37744-38202 | S-adenosyl-L-methionine hydrolase [Escherichia phage S523]                   |                       |           |

25  
26  
27  
28  
29

Table S2. Comparison of phages against the LPST153 genome.

| Phage                     | Country | Accession | Genome length(bp) | E value | BLASTN score | Query cover | Identify | Genus                 | Ref.                               |
|---------------------------|---------|-----------|-------------------|---------|--------------|-------------|----------|-----------------------|------------------------------------|
| Salmonella phage BP12A    | Canada  | KM366096  | 39696             | 0       | 57061        | 95%         | 972%     | <i>Teseptimavirus</i> | unpublished                        |
| Enterobacteria phage BA14 | USA     | EU734171  | 39816             | 0       | 42391        | 89%         | 85.45%   | <i>Teseptimavirus</i> | unpublished                        |
| Enterobacteria phage 285P | China   | GQ468526  | 39270             | 0       | 42134        | 88%         | 85.43%   | <i>Teseptimavirus</i> | unpublished                        |
| Escherichia phage S523    | China   | MH031343  | 39825             | 0       | 42664        | 89%         | 89.67%   | <i>Teseptimavirus</i> | unpublished                        |
| Salmonella phage BSP161   | Korea   | MG471392  | 39688             | 0       | 42454        | 88%         | 87.69%   | <i>Teseptimavirus</i> | unpublished                        |
| Escherichia phage P694    | China   | KP090454  | 40477             | 0       | 41407        | 85%         | 87.38%   | <i>Teseptimavirus</i> | Chen et al 2016                    |
| Kluyvera phage Kvp1       | Canada  | FJ194439  | 39472             | 0       | 42708        | 87%         | 878%     | <i>Teseptimavirus</i> | <a href="#">Lingohr et al 2008</a> |
| Escherichia phage D226    | China   | MN080711  | 40050             | 0       | 43340        | 88%         | 86.86%   | <i>Teseptimavirus</i> | unpublished                        |
| Erwinia phage FE44        | Ukraine | KF700371  | 39860             | 0       | 42714        | 88%         | 89.24%   | <i>Teseptimavirus</i> | Chen et al 2016                    |
| Yersinia phage Yep-phi    | China   | HQ333270  | 38616             | 0       | 34941        | 83%         | 85.74%   | <i>Teseptimavirus</i> | Zhao et al 2011                    |
| Yersinia phage Yepe2      | USA     | EU734170  | 38677             | 0       | 34763        | 82%         | 85.68%   | <i>Teseptimavirus</i> | unpublished                        |
| Yersinia phage YpP-G      | USA     | JQ965702  | 39415             | 0       | 34763        | 82%         | 85.65%   | <i>Teseptimavirus</i> | Rashid Et,al, 2012                 |
| Shigella phage VB_Ship_A7 | China   | MK685668  | 40058             | 0       | 38491        | 82%         | 89.76%   | <i>Teseptimavirus</i> | unpublished                        |
| Escherichia phage P483    | China   | NC_028822 | 40829             | 0       | 41663        | 89%         | 85.63%   | <i>Teseptimavirus</i> | Chen et al 2016                    |
| Pectobacterium phage PP74 | Russian | KY084243  | 39790             | 0       | 37527        | 84%         | 85.96%   | <i>Teseptimavirus</i> | <a href="#">Bugaeva et al 2018</a> |
